# Supplementary material for: Biosynthetic gene cluster and antimicrobial activity of the elfamycin antibiotic factumycin
Source: Royal Society of Chemistry journal article supplement (doi:10.1039/c2md20038d), 2012-01-01
Supplement: c2md20038d.pdf [file c2md20038d.pdf]

Cite this: DOI: 10.1039/c0xx00000x

www.rsc.org/xxxxxx

**ARTICLE TYPE**

**SUPPLEMENTARY DATA:**

MS-MS analysis of Factumycin.

| Fragment                                                                           | Molecular formula                                                | [M+H] <sup>+</sup> calc. | [M+H] <sup>+</sup> obs. |
|------------------------------------------------------------------------------------|------------------------------------------------------------------|--------------------------|-------------------------|
| 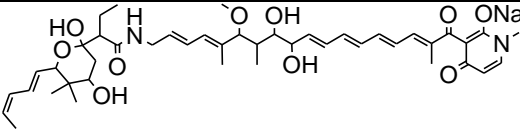  | C <sub>44</sub> H <sub>61</sub> N <sub>2</sub> NaO <sub>10</sub> | 801.4304                 | 801.4233                |
|   | C <sub>39</sub> H <sub>56</sub> N <sub>2</sub> O <sub>5</sub>    | 633.4269                 | 633.3235                |
|   | C <sub>32</sub> H <sub>51</sub> NO <sub>2</sub>                  | 482.4000                 | 482.2824                |
|  | C <sub>26</sub> H <sub>37</sub> NO                               | 380.2955                 | 380.2167                |

5

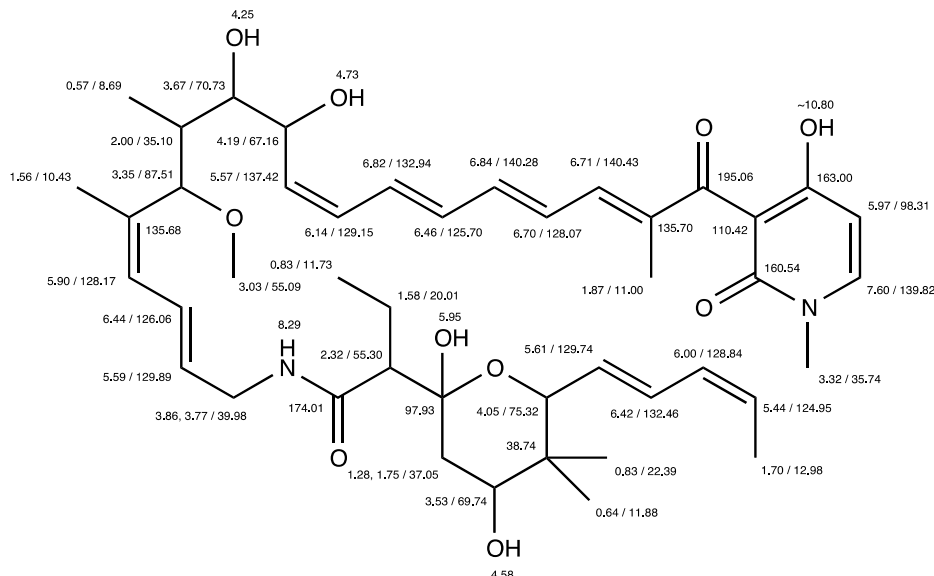

**Supplementary Figure 1.** Structural assignment of Factumycin. Chemical shift values are as observed in the HSQC / HMBC spectra.

Factumycin: yellow powder; HR negative MS  $m/z$  777.4444 for  $[M-H]^-$  (calculated for  $C_{44}H_{61}N_2O_{10}$ , 777.4326); <sup>1</sup>H NMR (700 MHz, DMSO-*d*<sub>6</sub>) δ 10.77 (s, 1H), 8.29 (t,  $J$  = 5.7 Hz, 1H), 7.60 (d,  $J$  = 7.5 Hz, 1H), 6.84 (m, 1H), 6.81 (m, 1H), 6.71 (m, 1H), 6.70 (m, 1H), 6.46 (m, 1H), 6.43 (m, 1H), 6.42 (m, 1H), 6.14 (t,  $J$  = 11.2 Hz, 1H), 6.00 (td,  $J$  = 11.2, 1.9 Hz, 1H), 5.97 (d,  $J$  = 7.5 Hz, 1H), 5.90 (d,  $J$  = 10.7 Hz, 1H), 5.62 (m, 1H), 5.59 (m, 1H), 5.56 (d,  $J$  = 9.7 Hz, 1H), 5.44 (dq,  $J$  = 10.8, 7.1 Hz, 1H), 4.19 (t,  $J$  = 8.7 Hz, 1H), 4.06 (d,  $J$  = 5.4 Hz, 1H), 3.86 (m, 1H), 3.77 (m, 1H), 3.67 (dd,  $J$  = 8.6, 1.7 Hz, 1H), 3.54 (dd,  $J$  = 11.6, 4.8 Hz, 1H), 3.35 (d,  $J$  = 10.0 Hz, 1H), 3.32 (s, 3H), 3.03 (s, 3H), 2.32 (dd,  $J$  = 9.1, 6.0 Hz, 1H), 2.00 (m, 1H), 1.87 (s, 3H), 1.75 (dd,  $J$  = 12.6, 4.7 Hz, 1H), 1.70 (dd,  $J$  = 7.1, 1.7 Hz, 3H), 1.58 (m, 2H), 1.56 (s, 3H), 1.28 (t,  $J$  = 12.1 Hz, 1H), 0.84 (m, 3H), 0.84 (s, 3H), 0.65 (s, 3H), 0.57 (d,  $J$  = 7.0 Hz, 3H). <sup>13</sup>C NMR (176 MHz, DMSO-*d*<sub>6</sub>) δ 195.34, 174.11, 163.11, 160.92, 140.75, 140.63, 140.14, 137.79, 135.86, 135.80, 133.28, 132.73, 130.03, 130.02, 129.48, 129.20, 128.43, 128.25, 126.41, 126.09, 125.26, 110.89, 98.66, 98.02, 87.78, 75.56, 70.98, 69.99, 67.42, 55.56, 55.39, 40.21, 38.79, 37.32, 36.00, 35.29, 22.65, 20.25, 13.22, 12.15, 11.97, 11.26, 10.65, 8.96.



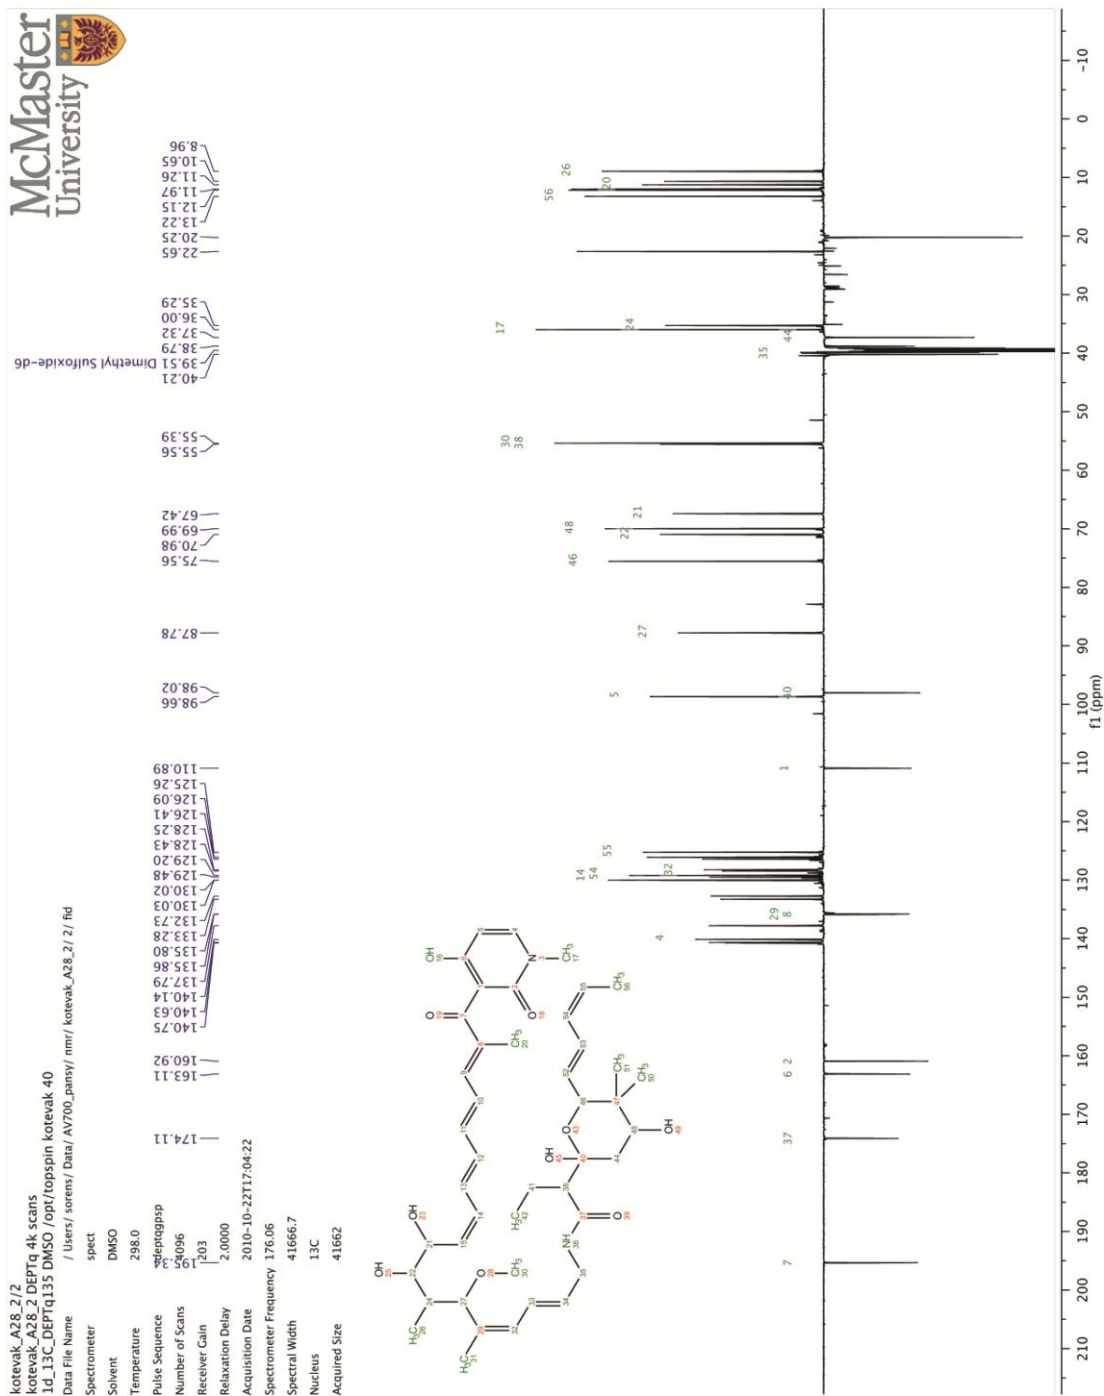

Supplementary Figure 3: DEPT q spectra of Factumycin

Cite this: DOI: 10.1039/c0xx00000x

www.rsc.org/xxxxxx

ARTICLE TYPE

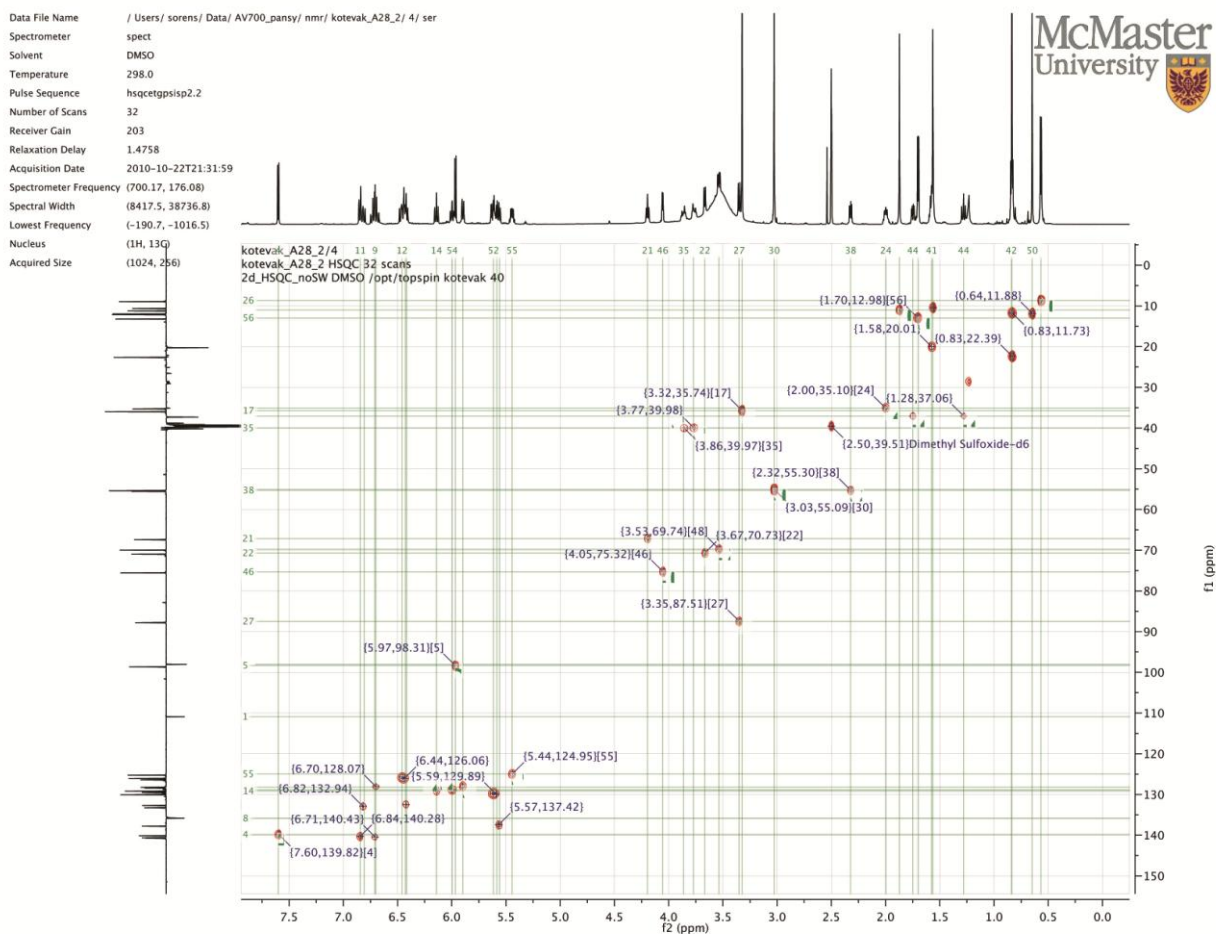

Supplementary Figure 4: HSQC spectra of Factumycin.

Data File Name / Users/soresns/Data/AV700\_pansy/nmr/kotevak\_A28\_2/5/ser  
Spectrometer spect  
Solvent DMSO  
Temperature 298.0  
Pulse Sequence hmbcgp12ndqf  
Number of Scans 64  
Receiver Gain 203  
Relaxation Delay 1.4959  
One-bond JHX 145  
Long-range JHX 8  
Acquisition Date 2010-10-23T01:07:19  
Spectrometer Frequency (700.17, 176.08)  
Spectral Width (8417.5, 38736.8)  
Lowest Frequency (-190.7, -978.5)  
Nucleus (1H, 13C)  
Acquired Size (4095, 128)

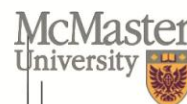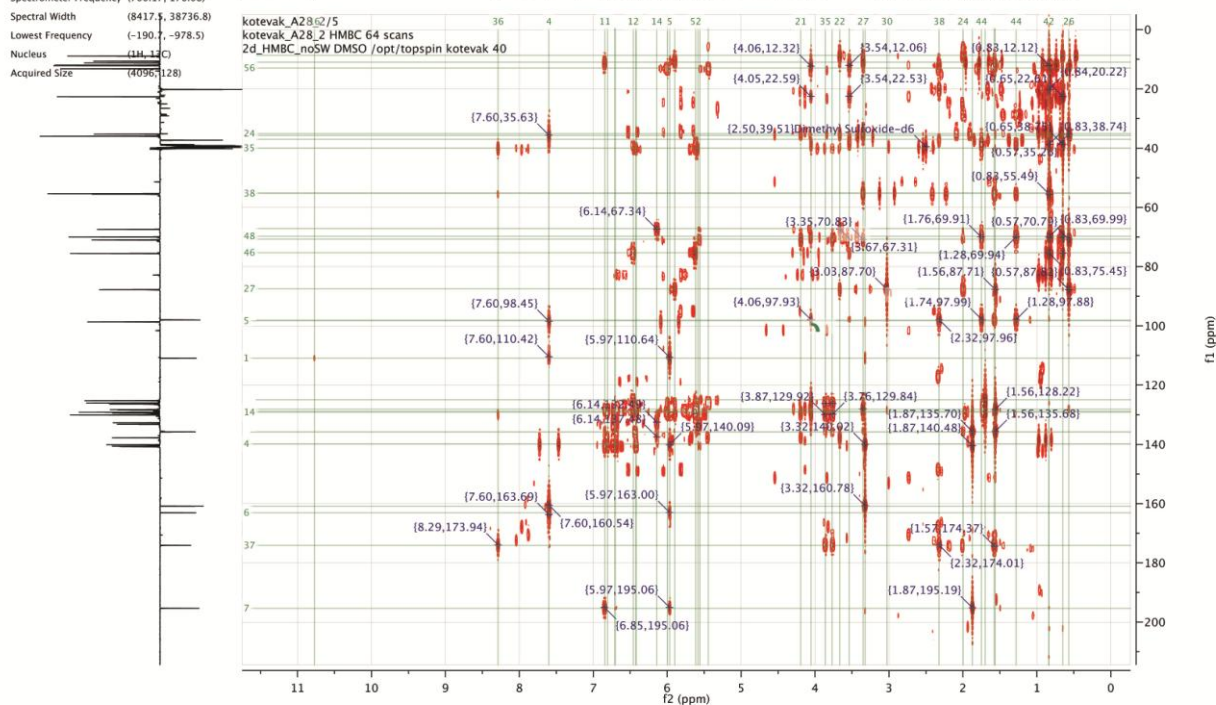

5

Supplementary figure 5: HMBC spectra of Factumycin.

Cite this: DOI: 10.1039/c0xx00000x

www.rsc.org/xxxxxx

**ARTICLE TYPE**

---
